# Supplementary material for: Genome-Wide Pathway Exploration of the Epidermidibacterium keratini EPI-7T
Source: MDPI journal article supplement (doi:10.3390/microorganisms11040870), 2023-03-28

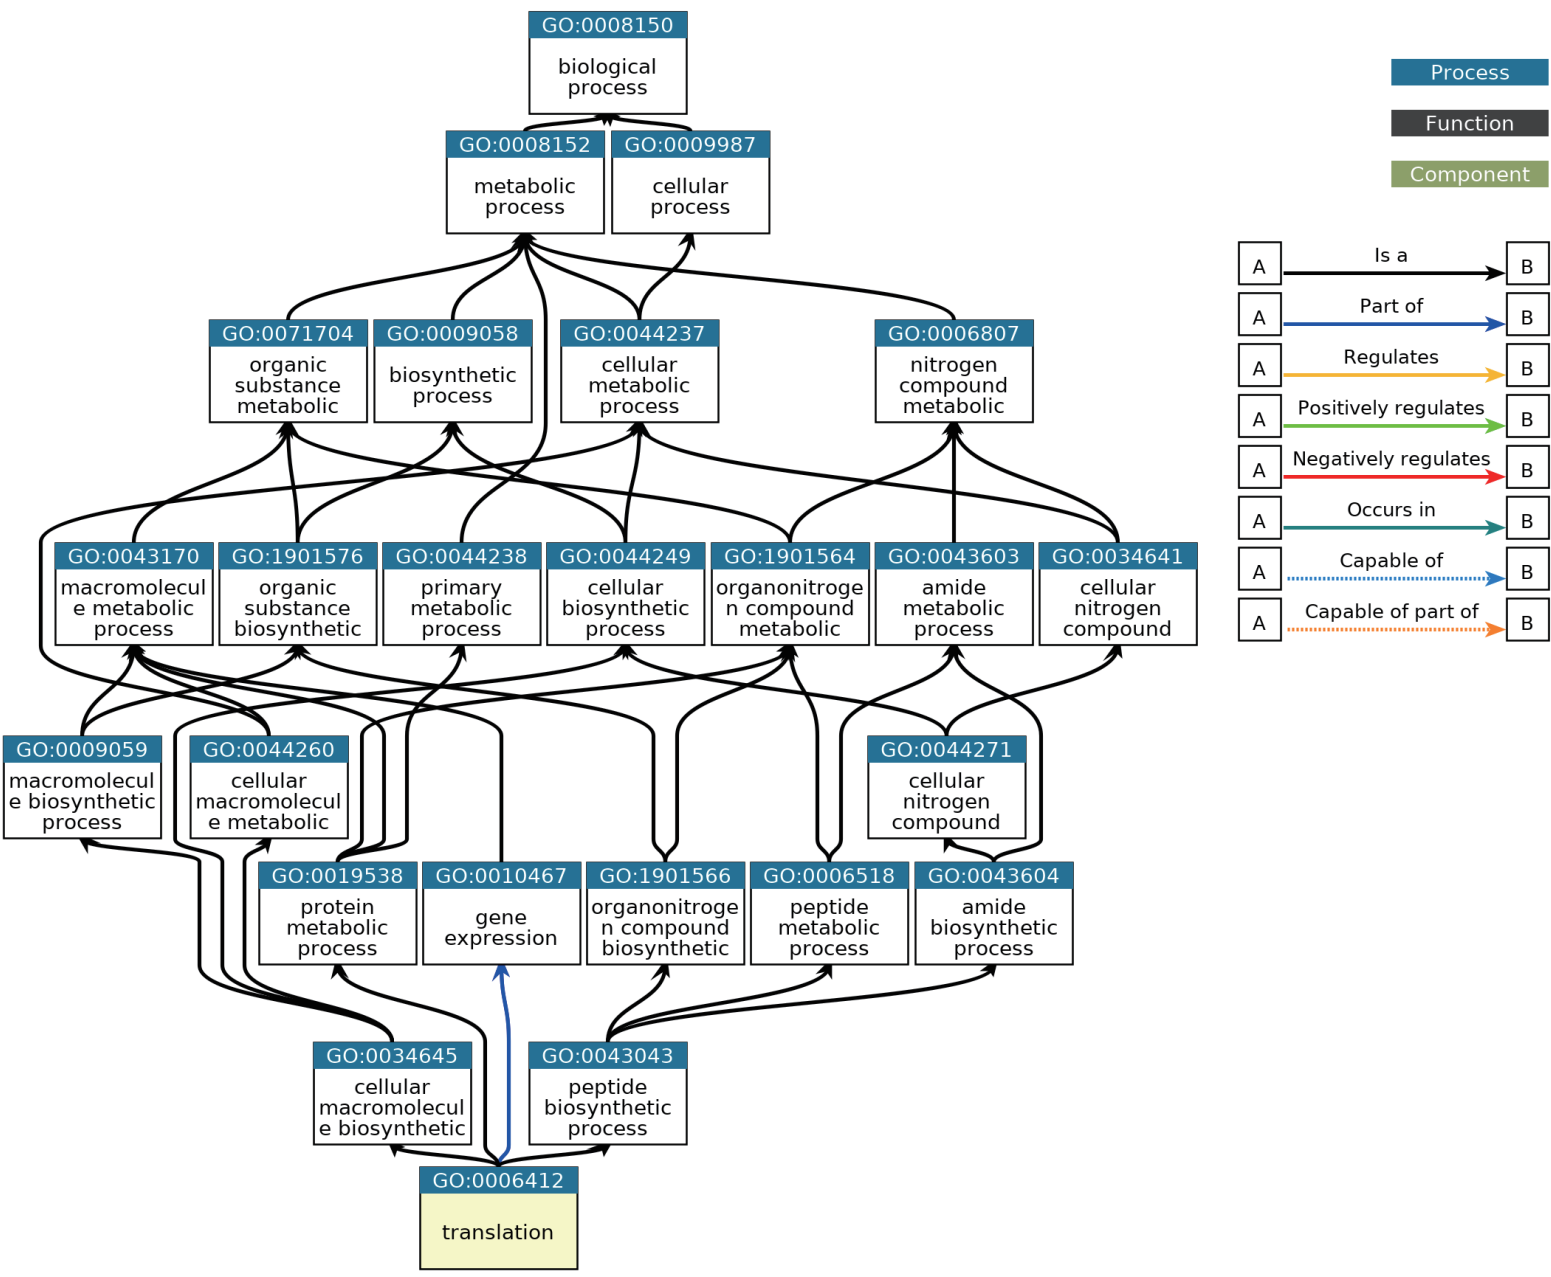

QuickGO - <https://www.ebi.ac.uk/QuickGO>

**Figure S2. Summary of shared GO enrichment between *E. keratini* EPI-7<sup>T</sup> and seven skin flora.**  
 The results are summarized in GO enrichment shared by skin flora and *E. keratini* EPI-7<sup>T</sup>. Three main categories: cellular components (green), molecular function (grey), and biological process (blue). And then, in GO enrichment, GO categories and GO terms of the clusters shared by the seven comparison strains. Translation” (GO:0006412, 46 clusters); “SOS response” (GO:0009432, 8 clusters); “de novo’ IMP biosynthetic process” (GO:0006189, 6 clusters); “Translation elongation factor activity ” (GO:0003746, 4 clusters); “Translation initiation factor activity” (GO:0003743, 3 clusters) were shown significant associations.

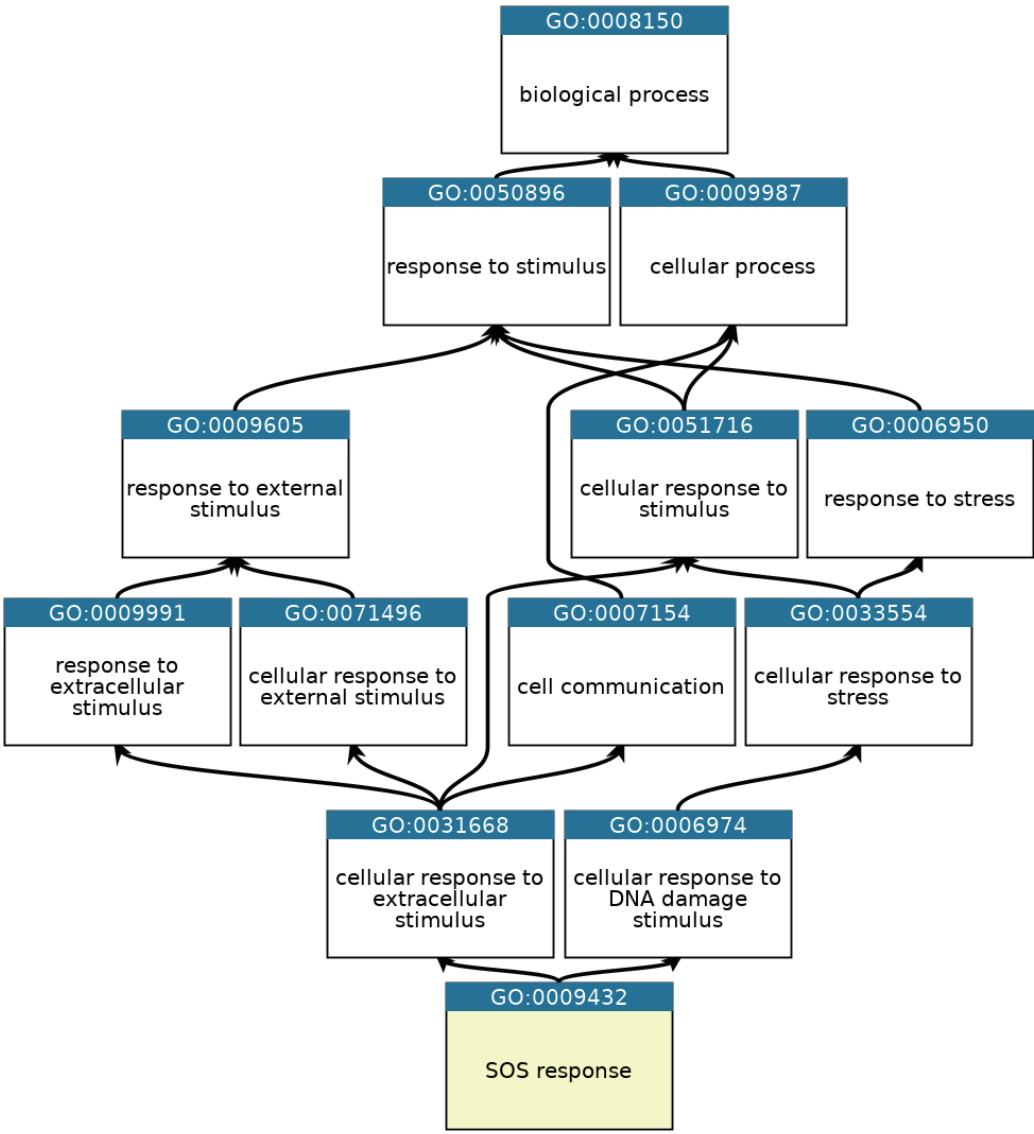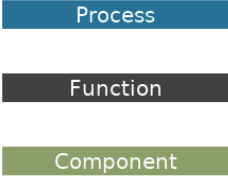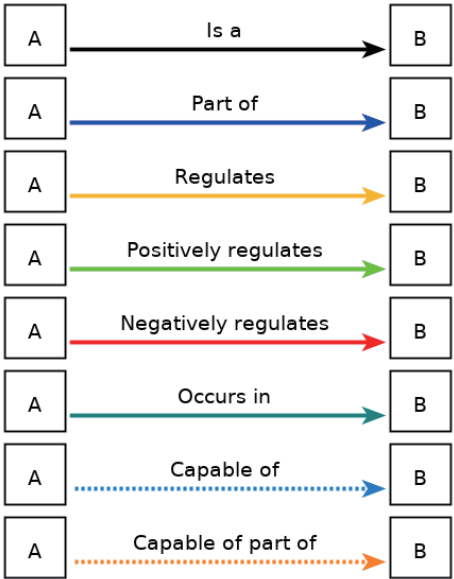

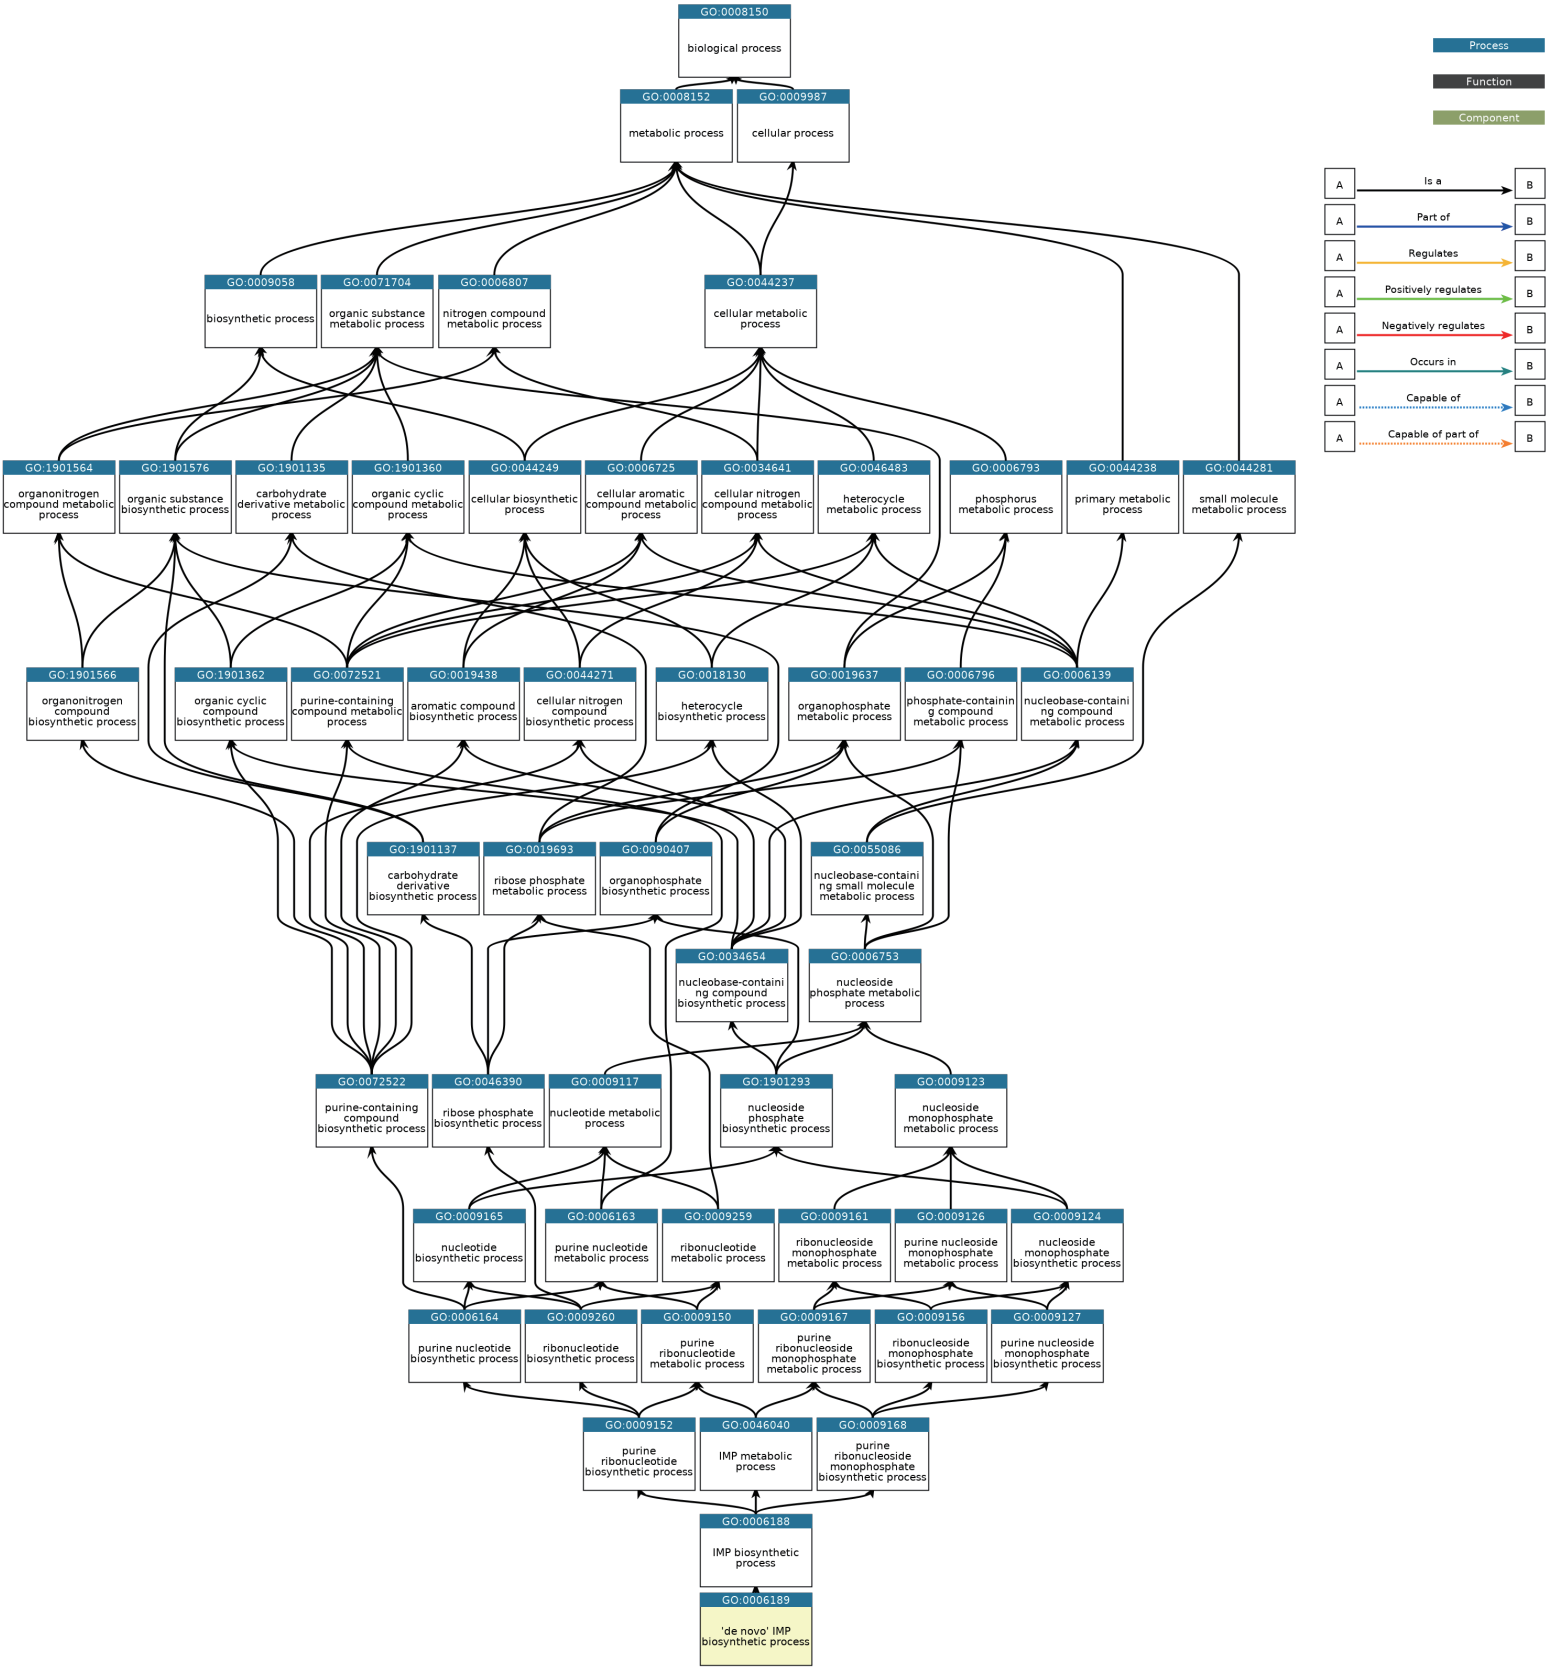



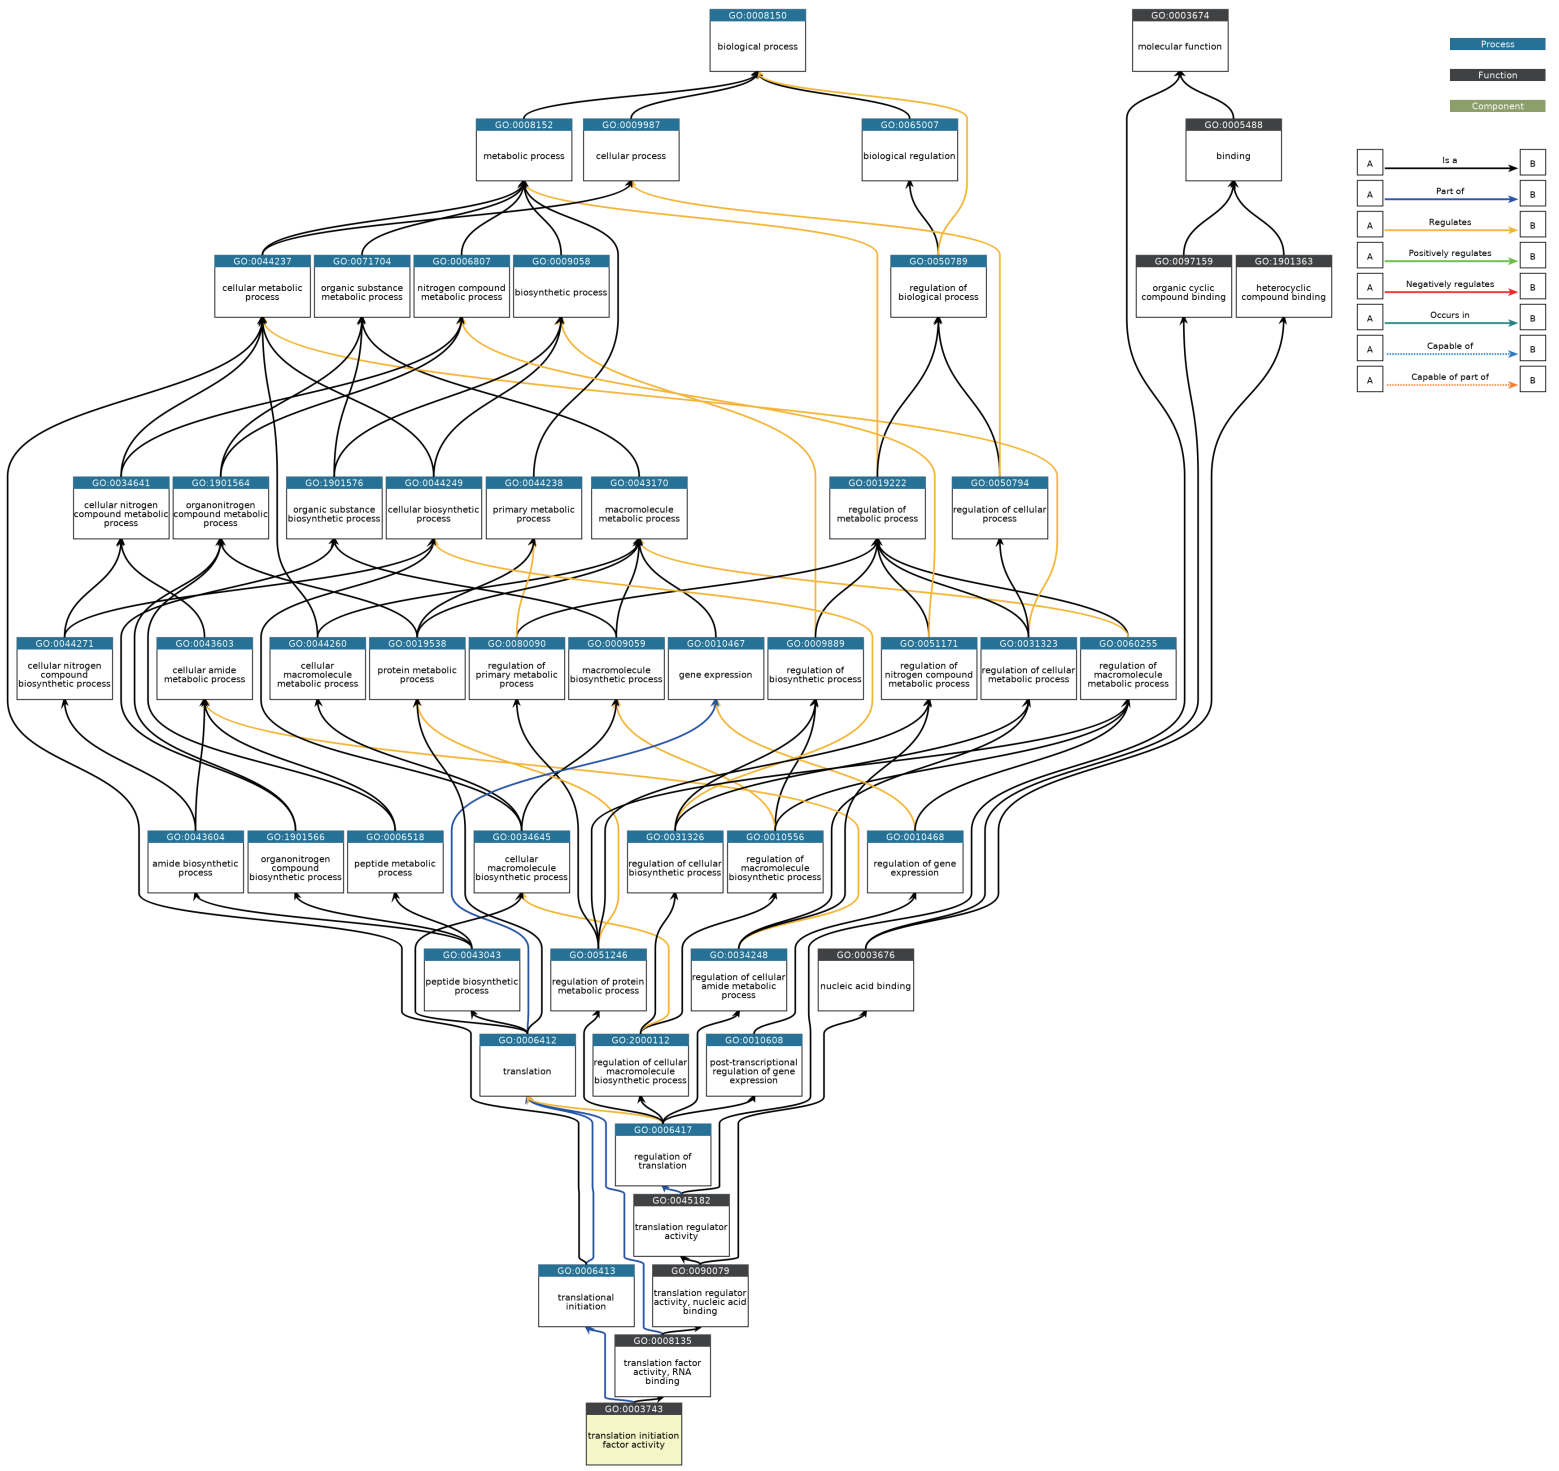

Supplement: s1 [file s1]
