# Supplementary material for: Genome-Wide Pathway Exploration of the Epidermidibacterium keratini EPI-7T
Source: MDPI journal article supplement (doi:10.3390/microorganisms11040870), 2023-03-28
Supplement: s1 [file s1]

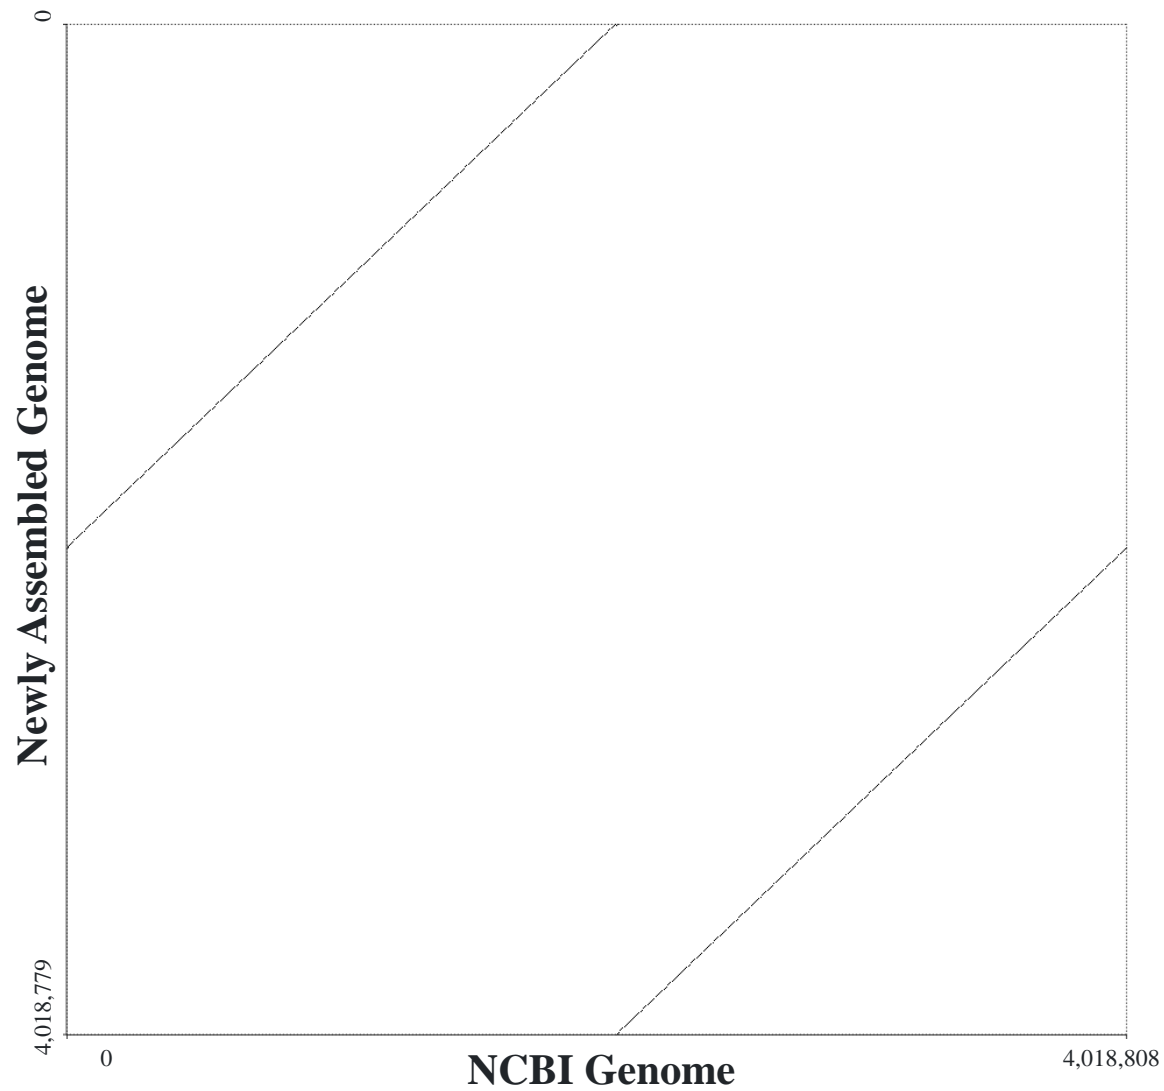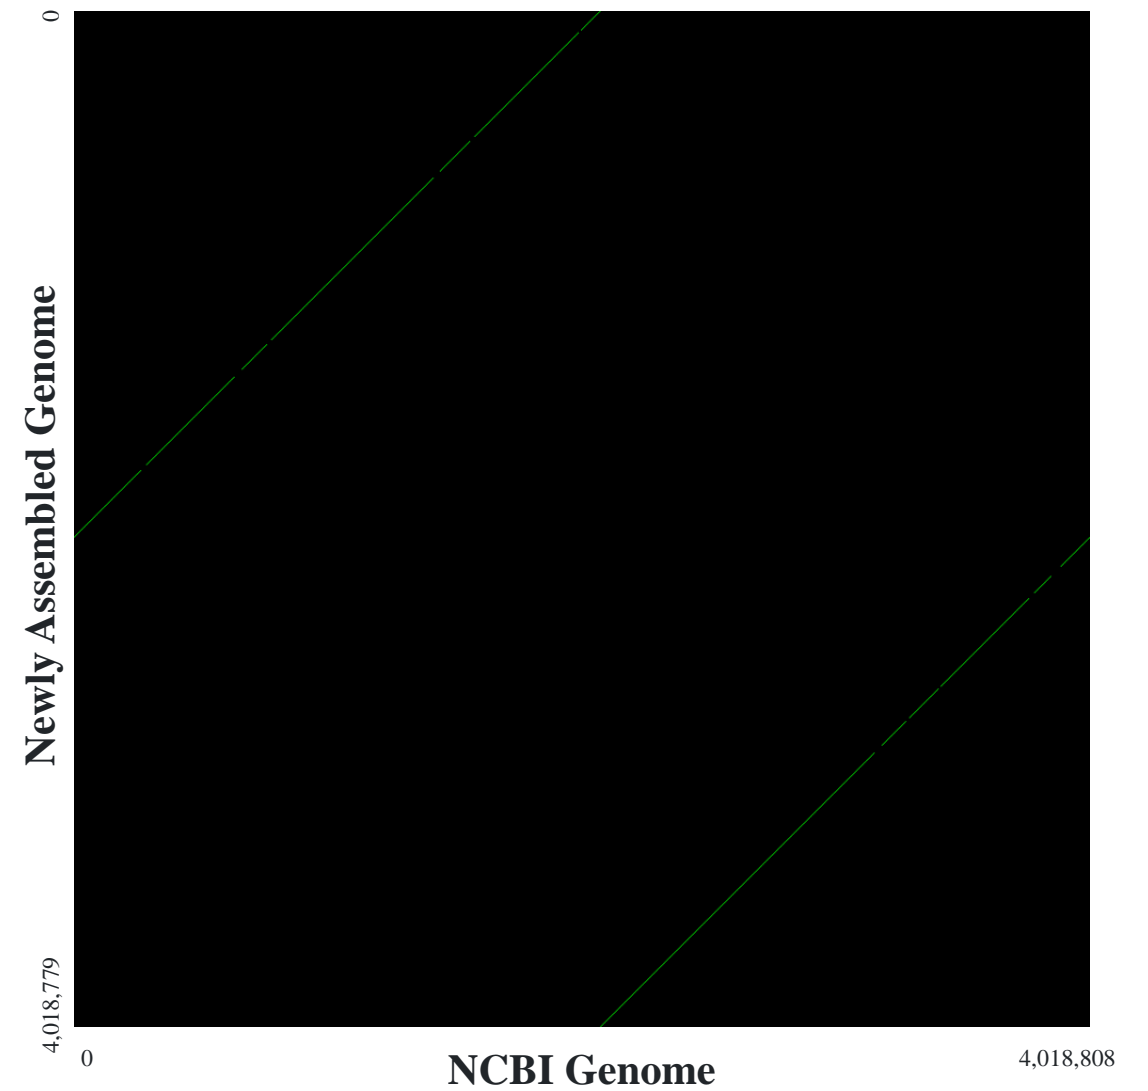

**Figure S1. Alignment of Genome using Chromeister**

Chromeister showed conserved blocks (red), inverted blocks (green), and transposed blocks (blue).
